# Supplementary material for: Plate motion drives variability in ocean oxygenation through the Phanerozoic
Source: Research Square preprint supplement (doi:10.21203/rs.3.rs-915282/v1), 2021-10-01
Supplement: Supplementary file 2 [file 457f1c8ffe9c3bef557e02b7.pdf]

This file provides additional discussion on the oscillations.
